# Supplementary material for: Welfare Assessment in Shelter Dogs by Using Physiological and Immunological Parameters
Source: PubMed Central journal article supplement (PMC6616394; doi:10.3390/ani9060340), 2019-06-11
Supplement: animals-09-00340-s001.pdf [file animals-09-00340-s001.pdf]

**SUPPLEMENTARY MATERIAL**

**Table S1.** Demographic characteristics of the dog

|                                                                | <b>Number</b> | <b>Percentage<sup>#</sup></b> | <b>Chi square</b> | <b>P value</b> |
|----------------------------------------------------------------|---------------|-------------------------------|-------------------|----------------|
| <b>Gender</b>                                                  |               |                               |                   |                |
| Female                                                         | 32            | 46.4%                         | 0.36              | 0.547          |
| Male                                                           | 37            | 53.6%                         |                   |                |
| <b>Age (months; median, first and third quartile)</b>          |               |                               |                   |                |
|                                                                | 24 (12, 36)   |                               | -                 | -              |
| <b>Size</b>                                                    |               |                               |                   |                |
| Small                                                          | 17            | 24.6%                         | 48.38             | <0.001         |
| Medium                                                         | 49            | 71.0%                         |                   |                |
| Large                                                          | 3             | 4.3%                          |                   |                |
| <b>Breed</b>                                                   |               |                               |                   |                |
| Mixed                                                          | 55            | 79.7%                         | 286.60            | <0.001         |
| Group 1- Sheepdogs and Cattle dogs*                            | 1             | 1.4%                          |                   |                |
| Group 2- Pinscher and Schnauzer - Molossoid and Swiss Mountain | 1             | 1.4%                          |                   |                |
| Group 3 – Terrier                                              | 1             | 1.4%                          |                   |                |
| Group 6- Scent hounds and related breeds                       | 5             | 7.2%                          |                   |                |
| Group 7- Pointing Dogs                                         | 3             | 4.3%                          |                   |                |
| Group 8 - Retrievers - Flushing Dogs - Water Dogs              | 2             | 2.9%                          |                   |                |
| Pitt bull                                                      | 1             | 1.4%                          |                   |                |
| <b>Coat</b>                                                    |               |                               |                   |                |
| Black and white                                                | 11            | 28.9%                         | 17.42             | 0.026          |
| Red and white                                                  | 3             | 7.9%                          |                   |                |
| Fawn                                                           | 5             | 13.2%                         |                   |                |
| Red                                                            | 3             | 7.9%                          |                   |                |
| Gold - cream                                                   | 2             | 5.3%                          |                   |                |
| Black                                                          | 2             | 5.3%                          |                   |                |
| White                                                          | 0             | 0.0%                          |                   |                |
| Liver                                                          | 1             | 2.6%                          |                   |                |
| Tricolour                                                      | 5             | 13.2%                         |                   |                |
| Grey                                                           | 6             | 15.8%                         |                   |                |

The prevailing category on the total number of participants is indicated in Italics (Chi-Square Goodness of Fit Tests).

Breed types were categorised according to Federation Cynologique Internationale (Federation Cynologique international n.d.).

**Table S2.** Matrix of the Pearson correlation coefficients. \*P<0.05, \*\*P<0.01 (2-tailed).

|                                          | <b>Fecal<br/>Cortisol<br/>(Pg/Mg)<sup>a</sup></b> | <b>β-endorphin<br/>(pg/mg)</b> | <b>Leukocytes<br/>(WBC *109/L)</b> | <b>Lymphocytes<br/>(%)</b> | <b>Neutrophils<br/>(%)</b> | <b>Monocytes<br/>(%)</b> |
|------------------------------------------|---------------------------------------------------|--------------------------------|------------------------------------|----------------------------|----------------------------|--------------------------|
| <b>β-Endorphin (Pg/ML)</b>               | 0.077                                             |                                |                                    |                            |                            |                          |
| <b>Leukocytes (WBC *109/L)</b>           | -0.120                                            | -0.045                         |                                    |                            |                            |                          |
| <b>Lymphocytes (%)</b>                   | -0.185                                            | -0.054                         | -0.238*                            |                            |                            |                          |
| <b>Neutrophils (%)</b>                   | 0.173                                             | -0.002                         | 0.180                              | -0.782**                   |                            |                          |
| <b>Monocytes (%)</b>                     | 0.150                                             | -0.078                         | 0.054                              | -0.151                     | 0.060                      |                          |
| <b>Basophils (%)<sup>b</sup></b>         | -                                                 | -                              | -                                  | -                          | -                          | -                        |
| <b>Lysozyme (Microgr/ML)<sup>a</sup></b> | 0.099                                             | -0.204*                        | -0.101                             | 0.061                      | -0.037                     | -0.126                   |

a After logarithmic transformation.

b Cannot be computed because at least one of the variables is constant.
